# Supplementary material for: Safety, Feasibility, and Efficacy of Vagus Nerve Stimulation Paired With Upper-Limb Rehabilitation After Ischemic Stroke
Source: PubMed Central journal article supplement — Stroke. 2015 Dec 28;47(1):143–50. doi: 10.1161/STROKEAHA.115.010477 (PMC4689175; doi:10.1161/strokeaha.115.010477), 2015-12-28
Supplement: str-47-143-s002.pdf [file str-47-143-s002.pdf]

**Acknowledgment Permission Form**

Journal Stroke

Manuscript No. 2015101067721

First author Danson

Title of work Safety, feasibility and efficacy of vagus nerve stimulation

**Acknowledgment Permission:**

Authors must provide written permission/approval from all individuals mentioned by name in the Acknowledgements section of a submitted manuscript. By signing this form, any and all acknowledged persons therefore state that they have read and approved the mention of their names in the Acknowledgment section of the aforementioned paper.

Printed Name JEN ALEXANDER

Signature Jen Alexander

Date 15/10/15

Printed Name ELIZABETH COLMOUTH

Signature E. Colmou

Date 15-10-15

Printed Name PAMELA MACKENZIE

Signature Pamela Mackenzie

Date 15/10/15

Printed Name \_\_\_\_\_

Signature \_\_\_\_\_

Date \_\_\_\_\_
