# Supplementary material for: Safety, Feasibility, and Efficacy of Vagus Nerve Stimulation Paired With Upper-Limb Rehabilitation After Ischemic Stroke
Source: PubMed Central journal article supplement — Stroke. 2015 Dec 28;47(1):143–50. doi: 10.1161/STROKEAHA.115.010477 (PMC4689175; doi:10.1161/strokeaha.115.010477), 2015-12-28
Supplement: str-47-143-s003.pdf [file str-47-143-s003.pdf]

### Acknowledgment Permission Form

Journal | Stroke  
 Manuscript No. | 2015/011724  
 First author | Jesse Dawson

Title of work  
Safety, Feasibility and Efficacy of Vagus Nerve Stimulation Paired with Upper Limb Rehabilitation Following Is

#### Acknowledgment Permission:

Authors must provide written permission/approval from all individuals mentioned by name in the Ackno section of a submitted manuscript. By signing this form, any and all acknowledged persons therefore sta have read and approved the mention of their names in the Acknowledgment section of the aforementioned

Printed Name | John Davis  
 Signature | [Signature]  
 Date | 16/10/2015  
 Printed Name | \_\_\_\_\_  
 Signature | \_\_\_\_\_  
 Date | \_\_\_\_\_  
 Printed Name | \_\_\_\_\_  
 Signature | \_\_\_\_\_  
 Date | \_\_\_\_\_  
 Printed Name | \_\_\_\_\_  
 Signature | \_\_\_\_\_  
 Date | \_\_\_\_\_
